# The Clock Input to the First Optic Neuropil of *Drosophila melanogaster* Expressing Neuronal Circadian Plasticity

Milena Damulewicz, Elzbieta Pyza\*

Department of Cell Biology and Imaging, Institute of Zoology, Jagiellonian University, Krakow, Poland

## Abstract

In the first optic neuropil (lamina) of the fly's visual system, two interneurons, L1 and L2 monopolar cells, and epithelial glial cells show circadian rhythms in morphological plasticity. These rhythms depend on clock gene *period* (*per*) and *cryptochrome* (*cry*) expression. In the present study, we found that rhythms in the lamina of *Drosophila melanogaster* may be regulated by circadian clock neurons in the brain since the lamina is invaded by one neurite extending from ventral lateral neurons; the so-called pacemaker neurons. These neurons and the projection to the lamina were visualized by green fluorescent protein (GFP). GFP reporter gene expression was driven by the *cry* promoter in *cry*-GAL4/UAS-GFP transgenic lines. We observed that the neuron projecting to the lamina forms arborizations of varicose fibers in the distal lamina. These varicose fibers do not form synaptic contacts with the lamina cells and are immunoreactive to the antisera raised against a specific region of *Schistocerca gregaria* ion transport peptide (ITP). ITP released in a paracrine way in the lamina cortex, may regulate the swelling and shrinking rhythms of the lamina monopolar cells and the glia by controlling the transport of ions and fluids across cell membranes at particular times of the day.

**Citation:** Damulewicz M, Pyza E (2011) The Clock Input to the First Optic Neuropil of *Drosophila melanogaster* Expressing Neuronal Circadian Plasticity. PLoS ONE 6(6): e21258. doi:10.1371/journal.pone.0021258

**Editor:** Efthimios M. C. Skoulakis, Alexander Flemming Biomedical Sciences Research Center, Greece

**Received:** November 30, 2010; **Accepted:** May 26, 2011; **Published:** June 27, 2011

**Copyright:** © 2011 Damulewicz, Pyza. This is an open-access article distributed under the terms of the Creative Commons Attribution License, which permits unrestricted use, distribution, and reproduction in any medium, provided the original author and source are credited.

**Funding:** Jagiellonian University grant K/ZDS/000793. The funder had no role in study design, data collection and analysis, decision to publish, or preparation of the manuscript.

**Competing Interests:** The authors have declared that no competing interests exist.

\* E-mail: elzbieta.pyza@uj.edu.pl

## Introduction

In the visual system of flies several processes show circadian oscillations. The rhythms have been detected in the retina and in the first optic neuropil (the lamina). The retina possesses its own circadian oscillators in the photoreceptor cells, while in the lamina the glial cells are possible circadian oscillators [1–3]. In the lamina, circadian rhythms have been detected in changes of the number of several structures in the photoreceptor terminals [4] and of synaptic contacts [5], and in morphological plasticity of interneurons [6–8] and glial cells [9]. In three fly species, *Musca domestica*, *Calliphora vicina* and *Drosophila melanogaster*, axons of the first order interneurons, L1 and L2 monopolar cells change their girth during the day [6,7,10,11]. Moreover, L2 dendritic trees examined in *D. melanogaster*, show circadian oscillation in their shape and size and are largest at the beginning of the day [8]. The function and mechanisms of circadian plasticity of monopolar cell axons and dendrites in the fly's visual system are only partly known. In the housefly, it has been found that injections of various lamina neurotransmitters mimic the morphological changes which were observed in the L1 and L2 axons [12]. We have also detected that protein synthesis is involved in cell swelling. Whereas, disruption of microtubules and actin microfilaments during the night, blocks shrinkage of the L1 and L2 axons and decreases the tetrad synapse number formed between the photoreceptor terminals and the lamina cells [13–15]. Changes in the L1 and L2 axon size are correlated with the pattern of the locomotor activity of the fly species and with the number of tetrad synapses. In *D. melanogaster*, the locomotor

activity pattern is bimodal. There are two peaks of activity; in the morning and in the evening. A similar pattern of changes was observed in the cross-sectional area of the L1 and L2 axons which was larger at the beginning of the day and at the beginning of the night [7]. Using *D. melanogaster* arrhythmic null mutant of *period* (*per*) gene, *per*<sup>01</sup>, we have found that this mutation abolishes the circadian rhythm in morphological changes of L2 dendritic trees. In turn, mutation of *cryptochrome* (*cry*) gene, *cry*<sup>b</sup>, encoding the circadian photoreceptor protein CRYPTOCHROME (CRY), changes the pattern of the rhythm [8]. On the other hand, severing the housefly's optic lobe from the rest of the brain also abolishes the rhythmic swelling and shrinking of L1 and L2. This result indicates that clock neurons located in the brain, are involved in the generation of circadian rhythms in the morphological changes of monopolar and glial cells in the lamina [16,17].

In the brain of *D. melanogaster*, there are about 150 clock neurons grouped into 7 sets: 3 dorsal and 4 lateral, on each side of the brain [18,19]. The dorsal neurons (DNs) are divided into 3 subgroups: 17 DN<sub>1s</sub>, 2 DN<sub>2s</sub> and 40 DN<sub>3s</sub>. The lateral neurons form 4 groups: 6 dorsal lateral neurons (LN<sub>d</sub>s), 5 small ventral lateral neurons (s-LN<sub>v</sub>s), 4–5 large ventral lateral neurons (l-LN<sub>v</sub>s) and lateral posterior neurons (LPNs). The s-LN<sub>v</sub>s maintain circadian rhythm in locomotor activity, in constant darkness (DD). In day/night (LD 12:12) conditions, the s-LN<sub>v</sub>s control the morning peak of activity. The LN<sub>d</sub>s and 5<sup>th</sup> s-LN<sub>v</sub> associate with DN<sub>1s</sub> to support the evening peak of activity [19,20–22]. Less is known about the function of DN<sub>1s</sub>. The DN<sub>1s</sub> are probably involved in integration of light and temperature inputs controlling behavioral rhythms

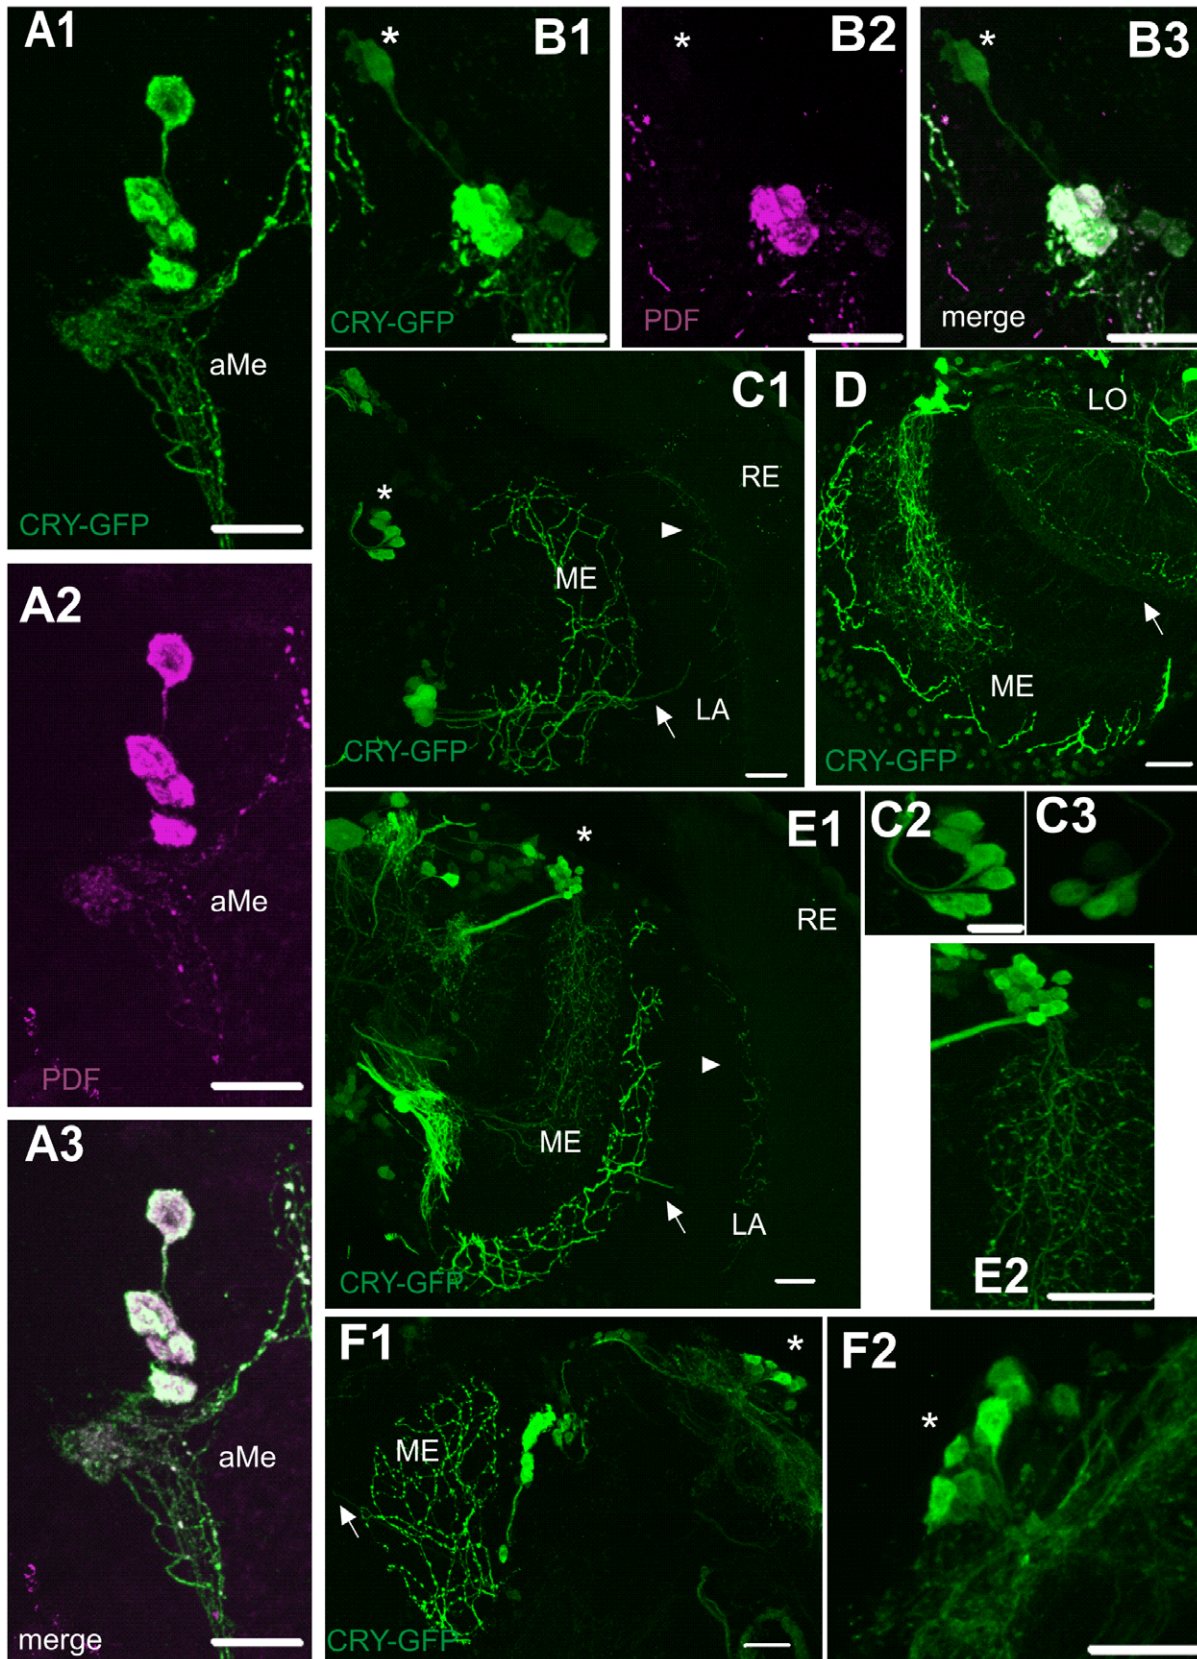

**Figure 1. Localization of CRY-positive cells in the brain of *Drosophila melanogaster*.** Flies were examined at four ZTs: ZT1, ZT4, ZT13 and ZT16 (ZT0 – the beginning of the day and ZT12 – the beginning of the night) but images shown in the Fig. 1 were obtained from the brain of individuals collected for experiments at different ZTs. ZT for each image is given in brackets. A1–3: Four large ventral lateral neurons (l-LN<sub>v,s</sub>), four small LN<sub>v,s</sub> (s-LN<sub>v,s</sub>) and an arborization in the accessory medulla (aMe) immunoreactive to PDF (magenta) and labeled with *cry*-GAL4-driven GFP

(green) (ZT1). B1–3: Double-labeling of the LN<sub>v</sub>s with PDF antiserum (magenta) and *cry*-GAL4-driven GFP (green) (ZT16). The 5<sup>th</sup> s-LN<sub>v</sub> expresses GFP but not PDF (asterisk). C1: *cry*-GAL4-driven GFP expression in the optic lobe: LN<sub>v</sub>s and LN<sub>d</sub>s (asterisk). The LN<sub>v</sub>s send processes to the medulla (ME) and a single projection to the lamina (LA) which divides and terminates in the lamina cortex (arrows) (ZT4). C2–3: CRY-positive dorsal lateral neurons (LN<sub>d</sub>s). Out of 6 LN<sub>d</sub>s (C2) (ZT4), 3–4 cells have a higher (by 45–80%) intensity of GFP than other LN<sub>d</sub>s in most preparations (C3) (ZT13). D: CRY-positive network of processes in the lobula (LO) (arrow). Processes from DN<sub>3</sub>s and LN<sub>v</sub>s in the medulla, also shown. E1–2: Dorsal neurons DN<sub>3</sub>s and LN<sub>v</sub>s. The LN<sub>v</sub>s project to the medulla (ME) and to the lamina (arrows) (ZT4). DN<sub>3</sub>s form a cluster of cells (asterisk) and send processes to the medulla (E2). F1–2: Network of processes of LN<sub>v</sub>s with varicosities in the medulla and in the lamina (arrow); CRY-positive DN<sub>3</sub>s (asterisk, F2) (ZT1). Scale bars: 20 μm; in C2: 10 μm.  
doi:10.1371/journal.pone.0021258.g001

[23,24]. The last group of pacemaker neurons, the lateral posterior neurons (LPNs) seem to be important for synchronization to the temperature cycle [18,25,26].

The small LN<sub>v</sub>s, with the exception of the 5<sup>th</sup> s-LN<sub>v</sub>, produce pigment-dispersing factor (PDF), a circadian neurotransmitter [27,28], which is important for synchronization in the phase and amplitude molecular oscillations of clock neurons within the circadian system [29,30]. PDF in the s-LN<sub>v</sub>s is probably non-amidated and is transported and released in the dorsal protocerebrum in a rhythmic manner [31]. It has been suggested that large LN<sub>v</sub>s produce C-terminally amidated PDF, and that this type of PDF has a longer half-life and is more active than the non-amidated form [32]. This neuropeptide is released in the medulla of *D. melanogaster* [33] but its receptors have also been detected at the base of the eye [34]. PDF may also synchronize peripheral clocks and transmit circadian information to non-clock cells [12,34–36]. The 5<sup>th</sup> s-LN<sub>v</sub> does not express PDF but it does express the ion transport peptide (ITP) [37]. Among the LN<sub>v</sub>s this is the only neuron that plays a role in regulating the evening activity peak [22].

Light is the most important donor of time perceived by several types of photoreceptors in *D. melanogaster*. These photoreceptor types include the retinal photoreceptors of the compound eyes, the ocelli on the top of head, the Hofbauer-Buchner eyelet in the lamina and the cellular photoreceptor – CRY. The last photoreceptor seems to be the most important for light entrainment. This is because strong phase shifts of the rhythms are caused by blue light for which CRY has the maximal absorption [38]. CRY resets the clock every morning, after photon absorption and binding TIMELESS (TIM) protein encoded by another clock gene *tim* [39]. Then, TIM is ubiquitinated and degraded in proteasomes [40]. This process also leads to degradation of the PER that forms heterodimers with TIM [41]. In this way, the molecular clock in the pacemaker cells is reset by light. CRY may also function in the molecular mechanism of the circadian clock in peripheral oscillators. CRY might function as the circadian repressor of two clock transcription factors; CLOCK (CLK) and CYCLE (CYC), which form heterodimers and regulate *per* and *tim* transcription [42–44].

In our earlier study we observed that PER and CRY are needed to maintain the circadian rhythms in the lamina of *D. melanogaster* [8]. However, the circadian input to the lamina was unknown. The large LN<sub>v</sub>s form a dense network of PDF-immunoreactive processes, in the medulla of the optic lobe, but this network terminates in the margin of the medulla. In the present study, we show for the first time, that this input exists and that it originates from the LNs. This input uses an ITP-like peptide as a neurotransmitter, an unknown yet signaling pathway in the circadian system.

## Results

Detected CRY-positive cells, using *cry*-GAL4 driven expression of GFP reporter gene, were found in the central brain and in the optic lobe. Labeling with anti-GFP, to strengthen GFP signal,

showed a strong fluorescence in the ventral lateral neurons (LN<sub>v</sub>s) (Fig. 1A1–3, B1–3), in the dorsal lateral neurons (LN<sub>d</sub>s) (Fig. 1C1,2), and in the dorsal neurons DN<sub>1</sub> and DN<sub>3</sub> (Fig. 1D, E1,2, F1,2). GFP was not detected in the dorsal neurons DN<sub>2</sub> and in the lateral posterior neurons (LPN).

Co-localization analysis of GFP and PDF-immunolabeling, showed that CRY is present in all LN<sub>v</sub>s; 4 large and 4 small PDF-positive LN<sub>v</sub>s, and in the 5<sup>th</sup> s-LN<sub>v</sub> PDF-negative (Fig. 1A1–3, B1–3). The small PDF-positive LN<sub>v</sub>s form a cluster of cells located next to each other in the accessory medulla (aMe). The 5<sup>th</sup> s-LN<sub>v</sub>, however, is detached from this cell cluster and localized more dorsally in the brain. The large LN<sub>v</sub>s are located above the s-LN<sub>v</sub>s in the brain. The PDF-immunoreactive varicose processes of the large LN<sub>v</sub>s invade the medulla and these processes were also positive to *cry*-GAL4 driven GFP (Fig. 1C1). The intensity of GFP fluorescence was stronger in l-LN<sub>v</sub>s than in s-LN<sub>v</sub>s. The more intense fluorescence in the l-LN<sub>v</sub>s suggests a higher level of CRY expression in the l-LN<sub>v</sub>s. The intensity of GFP fluorescence in the LN<sub>v</sub>s was measured at the following four time points in the LD 12:12 condition: ZT1, ZT4, ZT13 and ZT16, and the obtained results confirmed findings which have already been reported [45]. In l-LN<sub>v</sub>s, LN<sub>d</sub>s and in the 5<sup>th</sup> s-LN<sub>v</sub>, the GFP level was higher than in other s-LN<sub>v</sub>s and in DNs. Moreover, the level of GFP in the 5<sup>th</sup> s-LN<sub>v</sub> was the highest at ZT1 and higher at ZT16 than in ZT4 and ZT13 (Fig. 2). The pattern of changes of *cry*-GAL4 driven GFP intensity in the 5<sup>th</sup> s-LN<sub>v</sub> resembles the pattern of the daily morphological changes of L2 dendritic trees [8]. Both rhythms show maximum at the beginning of the day. These observations of the CRY level changes in DNs and LNs were confirmed by using anti-CRY serum (data not shown).

GFP driven by *cry*-GAL4 also visualized all 6 LN<sub>d</sub>s as CRY-positive cells (Fig. 1C1,2). These cells form a specific cluster in which neurons are located next to each other in one “bunch” and each single cell has a connection with the anterior optic tract (AOT). Out of 6 LN<sub>d</sub>s, 3 cells had a higher intensity of GFP fluorescence (Fig. 1C3) (ZT1: 153.7±49 SEM, ZT4: 124.7±14 SEM, ZT13: 177.6±21 SEM, ZT16: 101.7±2 SEM). The other 3 cells showed a fluorescence intensity which was 53%, 20%, 55%, 38% lower at ZT1 (72.7±17 SEM), ZT4 (100.4±13 SEM), ZT13 (79.5±14 SEM), ZT16 (62.9±5 SEM), respectively. These differences were observed in 6–9 flies per time point.

The DN<sub>3</sub>s form a cluster in the dorsal brain, next to the LN<sub>d</sub>s. We found that DN<sub>3</sub> of the dorsal neurons were all labeled with GFP, and that DN<sub>3</sub> processes invaded the medulla (Fig. 1E1, 2). In the medulla, the DN<sub>3</sub> projections form a dense network of processes between PDF-positive processes originating from the l-LN<sub>v</sub>s (Fig. 3A1–3). This DN<sub>3</sub> network seemed to originate from a single thick process extending from the DN<sub>3</sub> cluster of cells. The DN<sub>3</sub> processes form synaptic contacts with the medulla neurons (Fig. 3A3).

A CRY-positive network of processes is also present in the lobula, the third optic neuropil (Fig. 1D). This network is clearly separated from the medulla network. There were no observed connections between the CRY-positive networks in the neuropils

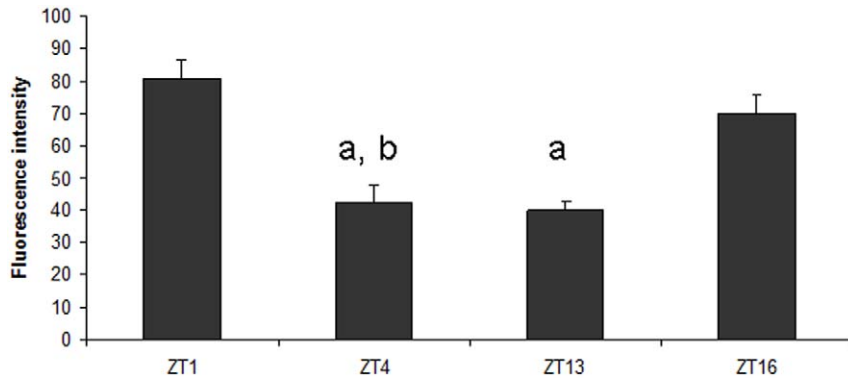

**Figure 2. *Cry*-GAL4-driven GFP intensity measured at different time points (ZTs) in the 5<sup>th</sup> s-LN<sub>v</sub> cell body.** Means ± SEM, a and b mean statistically significant differences between ZT1 and ZT16, respectively, and other time points. Statistics: Non-parametric ANOVA Kruskal-Wallis Range Test [N = 21; H = 11.755; p = 0.083]. doi:10.1371/journal.pone.0021258.g002

of both the lobula and medulla. The location of the cell bodies of the lobula processes is unknown.

We also detected CRY-positive processes in the lamina. These processes extend from the pacemaker neurons in the proximal medulla (Fig. 4A1–3). A single, straight neurite passes the medulla neuropil and invades the lamina, forming arborization of thin fibers in the lamina cortex (Fig. 4B3). These terminals are located near the retina, in the region of the somata of the lamina monopolar cells (Fig. 4B1,2). They do not extend to the retina, and terminate at the border of the fenestrated glia (Fig. 4C1,2). These CRY-positive processes in the lamina do not show any morphological changes during the day and during the night.

To examine possible synaptic contacts between CRY-positive terminals and the lamina cells, we used nc82 antibody against the active zone presynaptic protein Bruchpilot (BRP), to visualize presynaptic sites. Analysis of the co-localization of BRP and GFP at four time points, showed that CRY-positive terminals in the lamina do not form synaptic contacts with the lamina cells (Fig. 4D1–D3).

To determine the origin of the projection from the proximal medulla to the lamina, we used 100 μm vibratome sections and 3D reconstructions of neurons in the optic lobe. This method showed

that the projection extends from the aMe, where the s-LN<sub>s</sub> and l-LN<sub>s</sub> somata are located (Fig. 4A1–3). Double labeling with anti-PDF serum showed the lack of PDF-immunoreactivity in this neurite in the medulla and in its terminals in the lamina (Fig. 5A1–3). The results suggest that the projection to the lamina does not originate from the l-LN<sub>s</sub> or the four s-LN<sub>s</sub>, but from the 5<sup>th</sup> s-LN<sub>v</sub>. To verify if the projection originates from the 5<sup>th</sup> s-LN<sub>v</sub>, we used antibody raised against a specific region of *Schistocerca gregaria* neuropeptide ion transport peptide (ITP) (residues 60–67; DEEEKFNQ) (a kind gift from Dr. Neil Audsley). In addition, we tested the antisera specific for ITP-L, made to residues 65–79 (IQSWIKQIHGAEPGV) of *S. gregaria* ITP (a kind gift from Dr. Neil Audsley) and to RLRWamide (short neuropeptide F – sNPF-3 and -4) (a kind gift from Dr. Jan A. Veenstra). The results showed the co-localization of CRY and Schgr-ITP only (Fig. 5B1–3, C1–3). To confirm the presence of ITP in the lamina we carried out ITP immunolabeling using wild-type flies (Canton-S). ITP-positive varicose fibers in the lamina cortex were detected.

In addition to observing GFP fluorescence in clock cells, we observed GFP fluorescence in many other neurons in the brain. Using the antibody against REPO protein – a specific marker of glial cells, we did not observe co-localization of GFP and REPO.

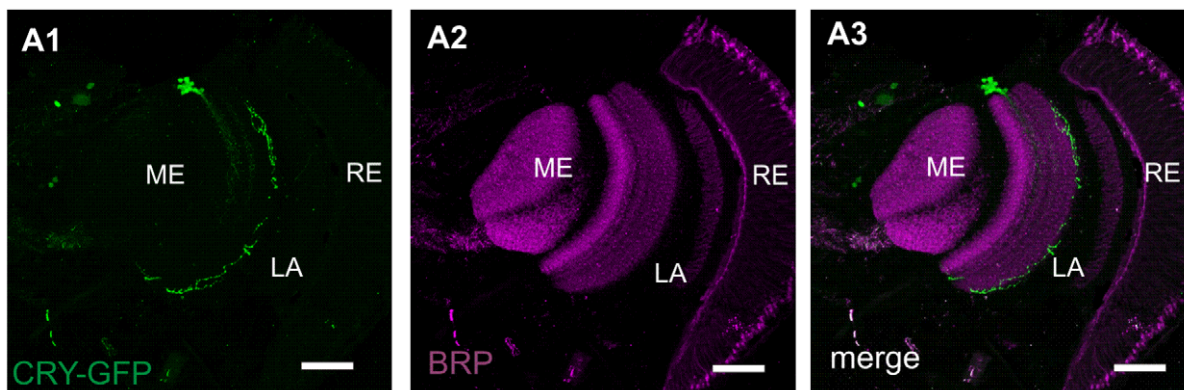

**Figure 3. Dorsal neuron (DN<sub>3</sub>) projections to the medulla labeled with *cry*-GAL4-driven GFP (A1, green) and immunolabeled with BRP (A2, magenta) antiserum.** Flies were examined at four ZTs: ZT1, ZT4, ZT13 and ZT16 (ZT0 – the beginning of the day and ZT12 – the beginning of the night) but images shown in Fig. 3 were obtained from the brain of individuals collected at ZT13. Projections from the DN<sub>3</sub> to the medulla may form synaptic contacts since co-localization of BRP and these CRY-positive processes have been observed (A3). RE – retina, LA – lamina, ME – medulla. Scale bars: 20 μm. doi:10.1371/journal.pone.0021258.g003

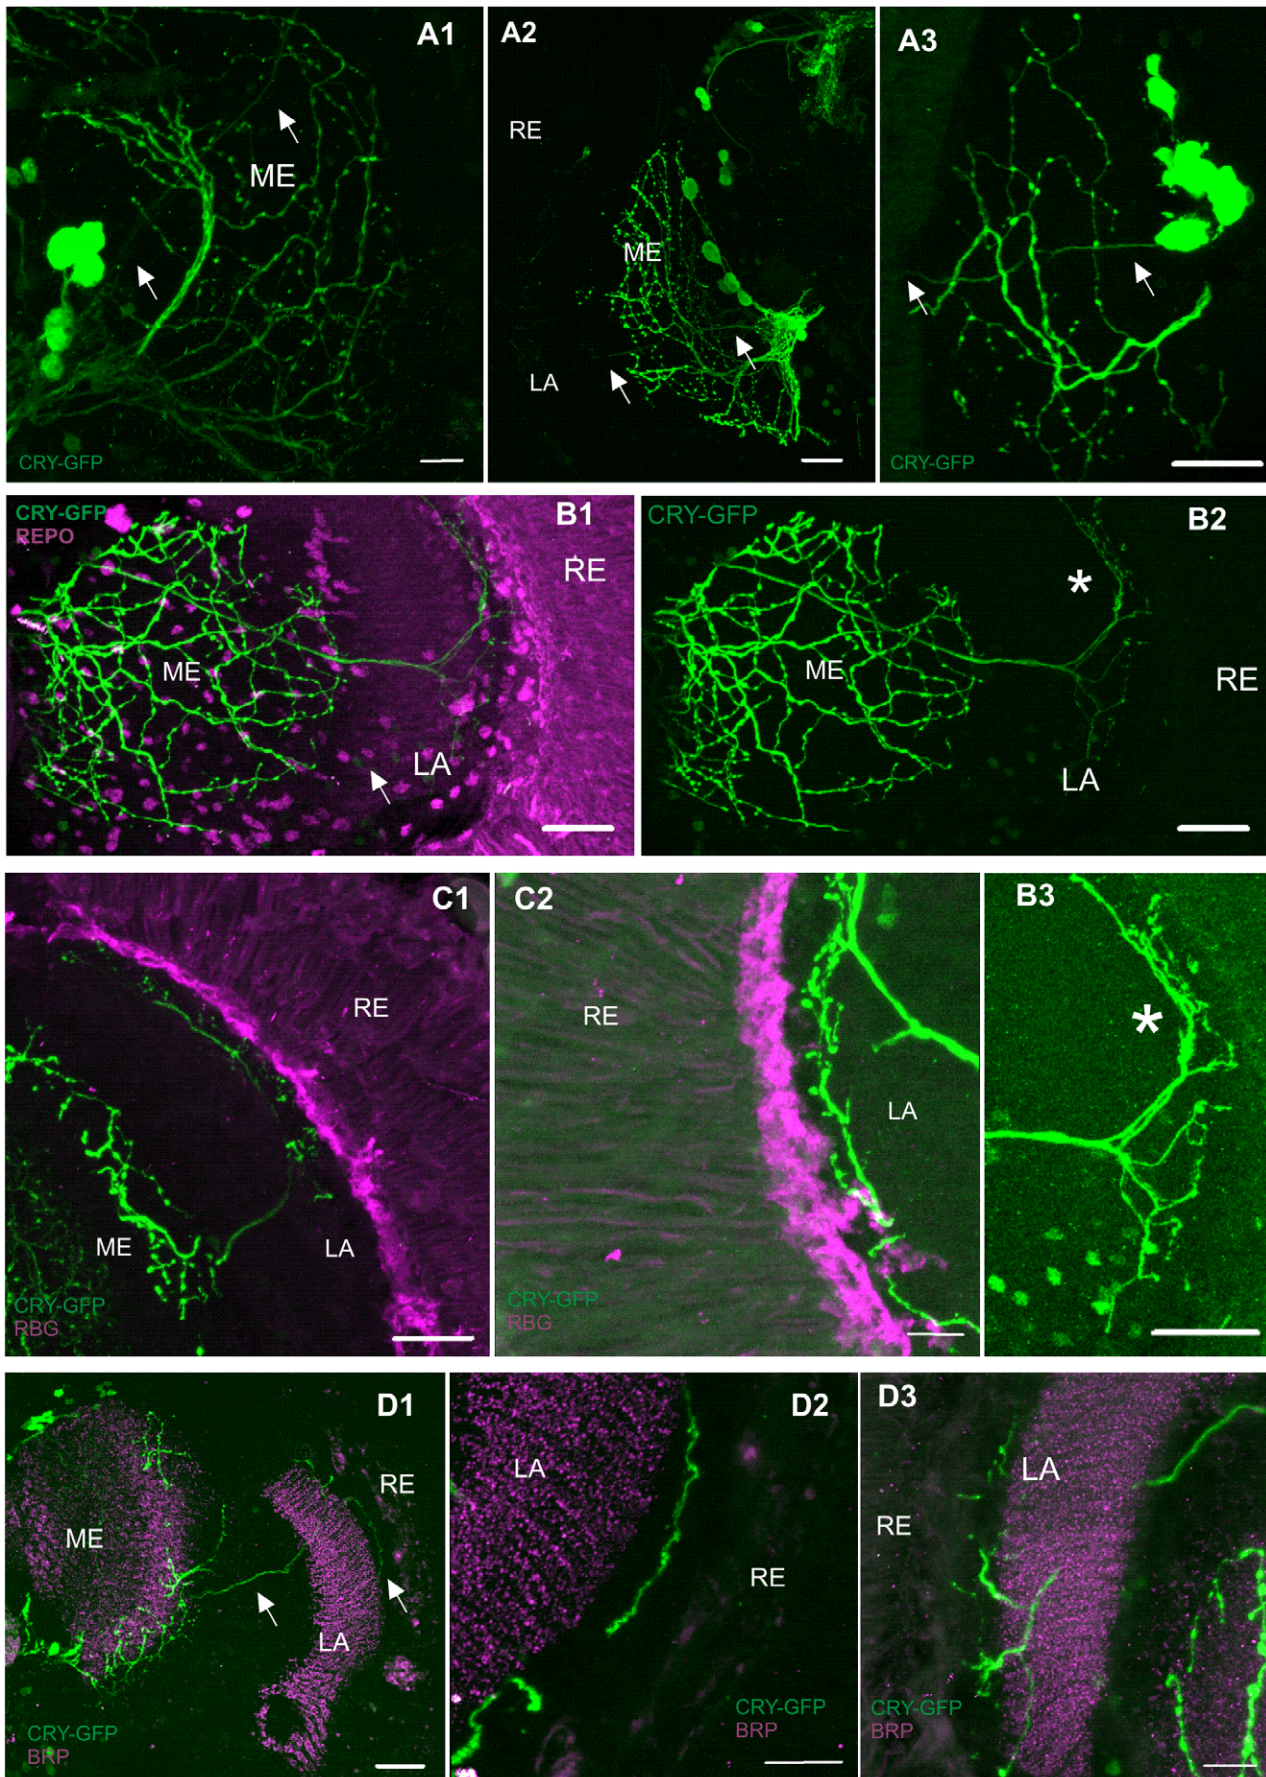

**Figure 4. CRY-positive processes in the medulla and lamina of *Drosophila melanogaster*.** Flies were examined at four ZTs: ZT1, ZT4, ZT13 and ZT16 (ZT0 – the beginning of the day and ZT12 – the beginning of the night) but images shown in Fig. 4 were obtained from the brain of individuals collected for experiments at different ZTs. ZT for each image is given in brackets. A1–3: *cry*-GAL4-driven GFP in the medulla and lamina. CRY-positive projection from lateral neurons (LN<sub>v,s</sub>) passes the medulla, invades the lamina (arrows), and terminates in the lamina cortex (A1: ZT16, A2: ZT13, A3: ZT1). B1–3: Cells labeled with *cry*-GAL4-driven GFP (green) and REPO-immunolabeled glial cells (magenta). Numerous cells in the medulla and lamina are CRY-positive, but REPO-negative (arrow). CRY-positive projection from the LN<sub>v,s</sub> divides in the lamina cortex. The projection forms arborized processes with varicosities (asterisk) (ZT4). C1–2: Immunolabeling of the fenestrated glia with the antibody against DVMAT (magenta) and *cry*-GAL4-driven GFP in processes (green) in the lamina cortex. CRY-positive terminals do not invade the layer of the fenestrated glia (C2) (C1: ZT16, C2: ZT13). D1–3: Immunolabeling with BRP (magenta) antiserum and cells labeled with *cry*-GAL4-driven GFP (green). A neuron projecting from the LN<sub>v,s</sub> to the lamina does not form synaptic contacts with the lamina cells (D2) (D1,2: ZT1, D3: ZT4). RE – retina, LA – lamina, ME – medulla. Scale bars: 20 μm.  
doi:10.1371/journal.pone.0021258.g004

This lack of co-localization indicates that CRY is probably not present in glial cells. Many CRY-positive cells, though, were located in the close vicinity of glial cells (Fig. 4B1–3). Finally we used the serum against the N-terminus of DVMAT [45] (a kind gift from Dr. Bernhard T. Hovemann), to label the fenestrated glia. We did this to find target cells for CRY-positive terminals in the lamina. These fibers, however, do not invade the fenestrated glia and terminate in the region of the L1 and L2 interneuron cell bodies (the lamina cortex) (Fig. 4C1,2).

## Discussion

In the present study we showed, for the first time, a single projection from the pacemaker cells in the brain to the lamina, in which several structural circadian rhythms have been detected [46]. Moreover, we found that this input probably originates from the 5<sup>th</sup> small LN<sub>v</sub>. Since the 5<sup>th</sup> s-LN<sub>v</sub> does not express PDF, this cell is different from the other LN<sub>v,s</sub>. The possibility that this process originates from other clock cells, for example from the LN<sub>d,s</sub>, and extends to the aMe first, and next to the lamina cannot be excluded. A CRY-positive LN<sub>d</sub>, which is immunoreactive to ITP, could invade the lamina by passing the aMe first. This neuron, however, is also immunoreactive to sNPF, but the projection detected in the lamina is immunoreactive to ITP only. It indicates that this projection originates from the 5<sup>th</sup> s-LN<sub>v</sub>, which is immunoreactive to ITP but not to sNPF. In our study, we examined GFP expression driven by *cry*-GAL4 in thin, 20 μm cryostat sections and thick 100 μm vibratome sections of the *D. melanogaster* brain. In most earlier studies on clock neurons and their projections, whole-mount preparations of the *Drosophila* brain were used, or the lamina was cut-off during preparation. Such procedures from previous studies meant that the very fine projection from the brain to the lamina could not be observed. We detected the projection by using 20 μm sections and collecting confocal optical sections at a 1 μm interval.

In several previous studies, it has been suggested that CRY is present in different types of clock neurons. These results have been obtained using various methods; *cry*-GAL4 driven GFP expression [18,19,47–50], *cry* mRNA *in situ* hybridization [48], immunolocalization [48,50] and *cry* deletion mutants [50]. Using *cry*-GAL4 line and 20 μm sections of the *D. melanogaster* brain, we found that CRY is located in all s-LN<sub>v,s</sub>, l-LN<sub>v,s</sub>, LN<sub>d,s</sub>, DN<sub>1,s</sub> and DN<sub>3,s</sub> but is absent in DN<sub>2,s</sub> and LPNs. These results only partly confirm the results of earlier studies by Klarsfeld et al. [49], Helfrich-Förster et al. [19], Yoshii et al. [45] and Benito et al. [50]. Yoshii et al. [45] showed that LN<sub>v,s</sub> but only some DN<sub>1</sub>, and three or four from the six LN<sub>d</sub> are CRY-positive, while DN<sub>2</sub>, DN<sub>3</sub> and LPNs are CRY-negative. Benito et al. [50] also did not detect CRY in DN<sub>2,s</sub> and DN<sub>3,s</sub>, and in about half of the LN<sub>d,s</sub> and DN<sub>1</sub>, but *cry* promoter dependent reporter genes and *cry* mRNA can be detected in these neurons. In our study, all of LN<sub>d,s</sub> showed GFP fluorescence in the *cry*-GAL4 strain, but only 3–4 cells were found to be CRY-

immunopositive using antibodies [45]. In turn, using the *in situ* hybridization method, *cry* mRNA was not detected in those cells [48]. Since the pattern of *cry*-GAL4 driven GFP expression depends on the transgene insertion site and whether the first intron of the transgene has been inserted, Zheng et al. [51] examined spatial and circadian regulation of *cry*. They used a series of *cry*-GAL4 transgenes containing different portions of *cry* upstream and intron 1 sequences. This study showed that the first intron drives expression in eyes and antennae and that upstream sequences induce *cry* expression in brain clock neurons and in peripheral oscillators; in eyes and antennae. In addition, upstream sequences also induce expression of *cry*, in other non-clock cells in the optic lobe.

The results obtained using various methods suggest that in the case of CRY, translation and *cry* transcription may be specifically regulated. CRY-positive labeling in the 4<sup>th</sup> LN<sub>d</sub> was observed in flies kept for 5 days in constant darkness. Flies kept longer in this condition brought on weak staining in one of the DN<sub>2</sub> neurons [45]. Thus, the level of CRY in this neuron may be very low, and the CRY level may only be detected after it has accumulated for several days in DD. It is possible, that in some of the LN<sub>d,s</sub>, DN<sub>1</sub> and DN<sub>3</sub> *cry* expression is very low and protein is undetectable by the immunohistochemistry method, or that *cry* mRNA is unstable and CRY protein is not synthesized. Among six LN<sub>d,s</sub>, three neurons, that show a strong signal of GFP in the brain cryostat sections used in our study, may correspond to CRY-positive cells detected in the studies of other authors. In turn, three LN<sub>d,s</sub> with weak GFP in our preparations may correspond to CRY immunonegative cells [50]. These cells had about a 50% lower GFP level than the rest of the LN<sub>d,s</sub> at all time points, except at ZT4 when their GFP fluorescence was lower by 20%.

Beside neurons, clock genes have also been detected in glial cells [45]. A subpopulation of glial cells in the brain of *D. melanogaster* have rhythmic expression of *per* gene, and they are necessary for maintaining circadian locomotor activity [52]. However, the presence of CRY in glia was not detected in our study. In the optic lobes, GFP driven by *cry*-GAL4 was observed in many non-clock cells in which the localization pattern was very similar to the distribution of glial cells. But these non-clock cells were not labeled with the antibody against REPO protein, a specific marker for glial cells. The REPO protein is required for glia development and differentiation [53] and has been detected in all types of glia in the adult brain of *D. melanogaster* [54]. The analysis of *cry*-GAL4 driven GFP and REPO immunolabeling showed no co-localization between CRY and REPO. However, in the close vicinity of GFP-positive cells, REPO-positive glial cells were observed. We obtained a similar result using the antibody against the *D. melanogaster* vesicular monoamine transporter (DVMAT), which enabled us to label the fenestrated glia in the optic lobe. These results suggest that CRY is present in non-clock neurons in the optic lobe, but not in glial cells.

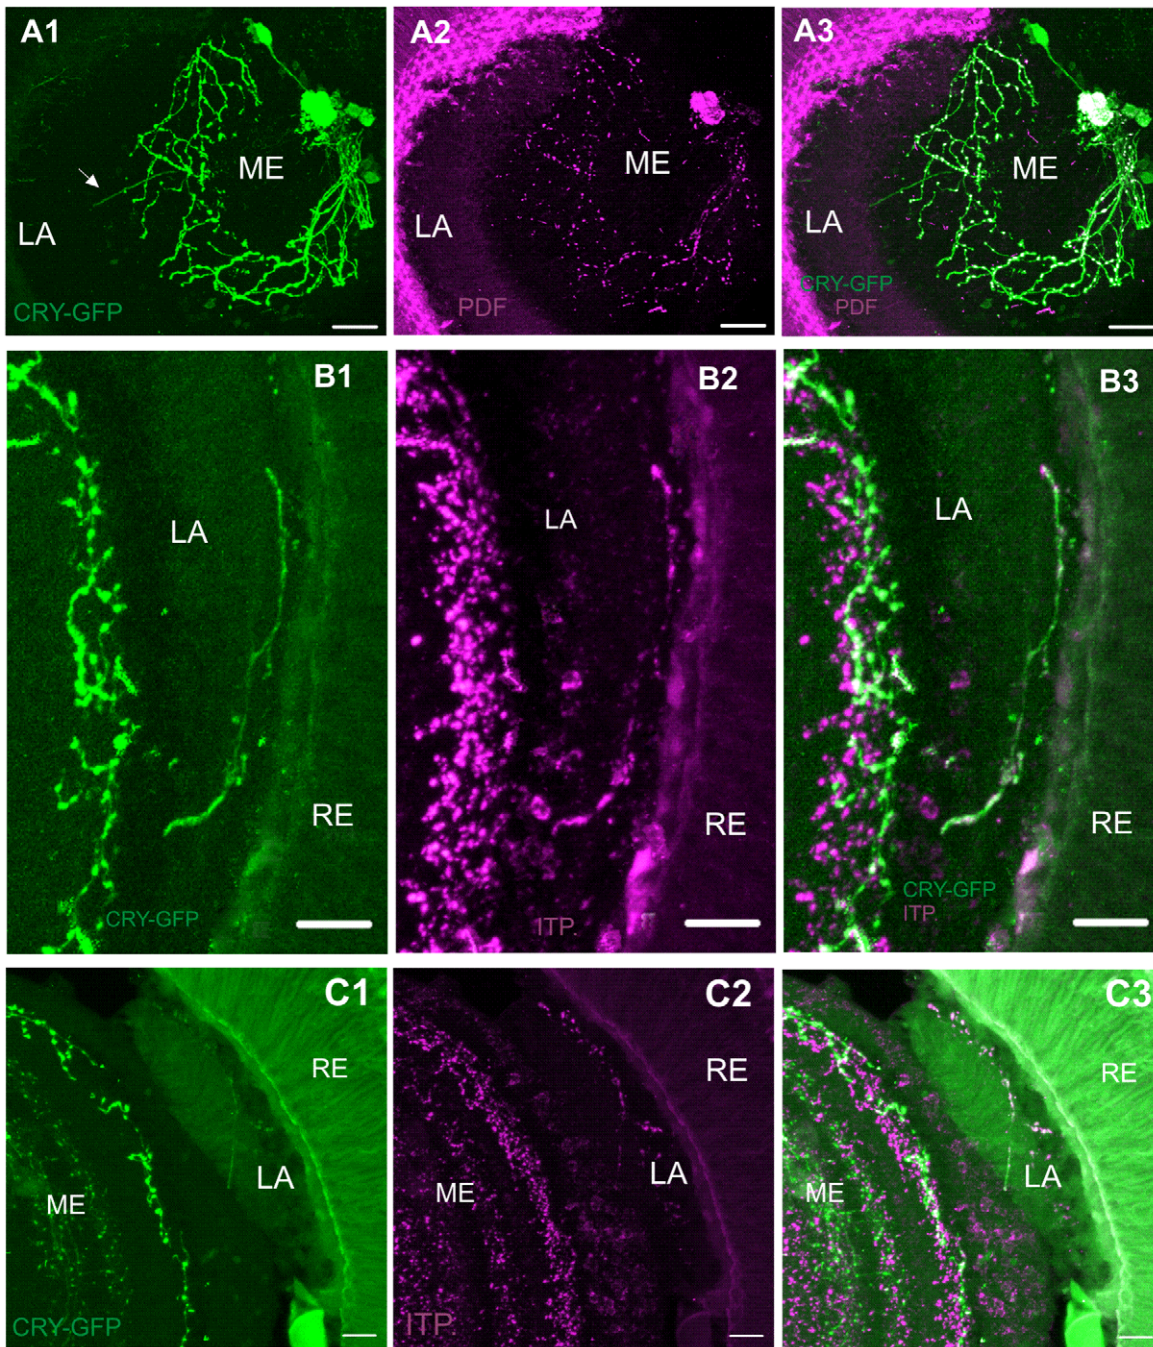

**Figure 5. Localization of PDF and ITP neuropeptides in the optic lobe of *Drosophila melanogaster*.** Flies were examined at four ZTs: ZT1, ZT4, ZT13 and ZT16 (ZT0 – the beginning of the day and ZT12 – the beginning of the night) but images shown in Fig. 5 were obtained from the brain of individuals collected for experiments at different ZTs. ZT for each image is given in brackets. A1–3: PDF- immunoreactive (magenta) and labeled with *cry*-GAL4-driven GFP (green) neurons. The 5<sup>th</sup> s-LN<sub>v</sub> is PDF-negative and PDF is also not present in CRY-positive projection invading the lamina (arrow) (ZT16). B1–3 (ZT1), C1–3: ITP-immunoreactive (magenta) and labeled with *cry*-GAL4-driven GFP (green) neurons. ITP- immunoreactivity co-localizes with CRY-positive processes in the lamina. The magenta staining in the retina is non-specific while in the medulla, ITP- immunoreactivity is both specific and unspecific (ZT13). RE – retina, LA – lamina, ME – medulla. Scale bars: 20  $\mu$ m.  
doi:10.1371/journal.pone.0021258.g005

In addition to localization of *cry*-GAL4 driven GFP in cell bodies of neurons, we also detected GFP processes invading three neuropils in the optic lobe. In the medulla, a dense network of processes originate from DN<sub>3</sub>s and their terminals seem to form synaptic contacts with not-yet identified target cells. The regular

network of processes was also detected in the lobula but their origin is unknown. The most interesting finding is the projection of CRY-positive processes to the lamina. Although the lamina showed robust circadian remodeling of neuron morphology, a circadian input had not been previously detected. In the lamina,

*per* is probably expressed in the epithelial glial cells, however, maintaining the lamina structural rhythms also requires *per* expression in the retina photoreceptors and in the LNs [55].

Beside PER, CRY is also important for circadian rhythms in the lamina. In our earlier study, we have shown that the circadian rhythm in morphological plasticity of L2 dendritic trees, is not present in *per*<sup>01</sup> mutant while its phase depends on CRY. In *cry*<sup>b</sup> mutant, the pattern of daily changes in size of the L2 dendritic tree was different than in wild-type Canton-S flies [8]. In males and females of Canton-S wild-type flies, the largest L2 dendritic tree was found at the beginning of the day. This daily pattern of the structural changes of L2 dendrite resembles the pattern of *cry* mRNA cycling in *D. melanogaster* heads and bodies [38], and in the 5<sup>th</sup> s-LN<sub>v</sub> detected in our study. Although the L2 dendritic tree is the largest at the beginning of the day in the distal lamina, its axon, as well as the axon of L1 monopolar cell, swell at the beginning of both day and night [7]. These changes have been detected in the proximal lamina. Moreover, the  $\alpha$ -subunit of the Na<sup>+</sup>/K<sup>+</sup>-ATPase and subunits of the V-ATPase also show diurnal changes in abundance in the lamina. Such an occurrence indicates that circadian rhythms in cell structural plasticity are correlated with rhythmic changes in the level of proteins involved in the transport of ions [55,56]. The rhythm in the  $\alpha$ -subunit of the Na<sup>+</sup>/K<sup>+</sup>-ATPase level is bimodal with two peaks; in the morning and in the evening. This pattern is changed in the *cry*<sup>0</sup> mutant (Damulewicz M. and Pyza E., unpublished results). It indicates that CRY is not only important for the maintenance of the daily pattern of morphological changes of the L2 dendritic tree [8] but CRY also helps to maintain cycling of the Na<sup>+</sup>/K<sup>+</sup>-ATPase in the epithelial glial cells in the lamina.

It is uncertain whether there is regulation of lamina rhythms by the brain pacemaker because connections between the pacemaker neurons in the accessory medulla and the lamina have not been observed. We have found, however, that rhythms in axon plasticity of neurons in the lamina are circadian, have two peaks - morning and evening, and are synchronized with locomotor activity [7,13,57]. Our present results now show, that

thin neurite extends from the aMe and arborizes in the distal lamina. In the aMe, the s-LN<sub>v</sub>s are regarded as the main pacemaker cells maintaining circadian rhythms [58]. The l-LN<sub>v</sub>s are involved in behavioral arousal and sleep [59,60]. For these reasons, the LN<sub>v</sub>s are good candidates as oscillators controlling lamina rhythms. Moreover, all LN<sub>v</sub>s except the 5<sup>th</sup> s-LN<sub>v</sub>, express PDF which may synchronize central oscillators with each other and with peripheral ones [34,61]. In the housefly, large PDF-immunoreactive neurons, similar to *D. melanogaster*'s l-LN<sub>v</sub>s, have terminals in the lamina which show circadian structural changes [62]. Moreover, these neurons cyclically release PDF [63] that affects circadian plasticity in the lamina. In *D. melanogaster*, release of PDF from PDF-immunoreactive processes in the medulla, where these processes form a dense network of varicose processes, is also possible [64]. These processes, however, do not extend to the lamina. In the present study, PDF immunolabeling of the newly described *D. melanogaster*'s CRY-positive terminals in the lamina was negative. This does not exclude PDF action in the lamina, particularly when PDF receptors have been detected in non-neuronal cells between the lamina and the retina [34]. PDF may diffuse in the lamina after release from terminals in the distal medulla.

Ion transport peptide (ITP) and short neuropeptide F (sNPF) have been detected in the LN<sub>v</sub>s [37]. Among the five s-LN<sub>v</sub>s, ITP was found in the 5<sup>th</sup> s-LN<sub>v</sub>, while sNPF was observed in four other s-LN<sub>v</sub>s which also express PDF. In the present study, we detected ITP-immunoreactive fibers, using the Schgr-ITP antisera, in the distal lamina, co-localized with *cry*-GAL4 driven GFP. The co-localization with ITP suggests that the projection into the lamina may originate from the 5<sup>th</sup> s-LN<sub>v</sub>. Little is known about the function of the 5<sup>th</sup> s-LN<sub>v</sub>. It has been suggested, that this neuron, together with LN<sub>4</sub>s and some DN<sub>1</sub>s, drive the evening peak of *D. melanogaster* bimodal activity [20,21]. Our finding indicates a possible new function of the 5<sup>th</sup> s-LN<sub>v</sub> in regulating circadian structural rhythms in the lamina, since this neuron is immunoreactive to ITP. Like other peptides in the optic lobe [64], ITP seems to be released from varicose terminals in a

**Table 1.** The primary antibodies used in the study.

| Antigens                                                   | Antisera                   | Dilution | Source                                                                                                                                                                                                                                                 |
|------------------------------------------------------------|----------------------------|----------|--------------------------------------------------------------------------------------------------------------------------------------------------------------------------------------------------------------------------------------------------------|
| Green Fluorescent Protein                                  | Rabbit polyclonal anti-GFP | 1:1,000  | Novus Biological<br>No NB 600-308                                                                                                                                                                                                                      |
| Green Fluorescent Protein                                  | Mouse monoclonal anti-GFP  | 1:1,000  | Novus Biological<br>No NB 600-597                                                                                                                                                                                                                      |
| PDF (Pigment Dispersing Factor)                            | PDFc7, mouse monoclonal    | 1:1,000  | Hybridoma                                                                                                                                                                                                                                              |
| BRP (Bruchpilot)                                           | Nc82 mouse monoclonal      | 1:30     | Hybridoma                                                                                                                                                                                                                                              |
| REPO                                                       | 8D12 mouse monoclonal      | 1:300    | Hybridoma                                                                                                                                                                                                                                              |
| DVMAT ( <i>Drosophila</i> Vesicular Monoamine Transporter) | Rat anti-DVMAT             | 1:200    | Provided by Dr. Bernhard T. Hovemann (Ruhr-Universität Bochum, Germany)                                                                                                                                                                                |
| ITP (Ion Transport Peptide)                                | Rabbit anti-ITP            | 1:1,000  | Provided by Dr. Neil Audsley (The Food and Environment Research Agency, Sand Hutton, UK). The antibody was raised against a specific region of <i>Schistocerca gregaria</i> ITP (residues 60–67; DEEEKFNQ) so that it will not cross-react with ITP-L. |
| ITP-L                                                      | Rabbit anti-ITP-L          | 1:1,000  | Provided by Dr. Neil Audsley. The antibody was made to residues 65–79 (IQSWIKQIHGAEPGV) of <i>S. gregaria</i> ITP                                                                                                                                      |
| sNPF (Short Neuropeptide F – sNPF-3 and -4)                | Rabbit anti-RLRWamide      | 1:1,000  | Provided by Dr. Jan A. Veenstra (Université Bordeaux, France). The antibody was raised against the peptide RLRWamide.                                                                                                                                  |

doi:10.1371/journal.pone.0021258.t001



**Table 2.** The secondary antibodies used in the study.

| Antisera                                   | Dilution | Source                  |
|--------------------------------------------|----------|-------------------------|
| Goat anti-rabbit conjugated with Alexa 488 | 1:1,000  | Molecular Probes        |
| Goat anti-mouse conjugated with Alexa 514  | 1:500    | Invitrogen              |
| Goat anti-rat conjugated with Cy3          | 1:500    | Jackson Immuno Research |
| Goat anti-mouse conjugated with Cy3        | 1:500    | Jackson Immuno Research |
| Goat anti-rabbit conjugated with Cy3       | 1:300    | Jackson Immuno Research |

doi:10.1371/journal.pone.0021258.t002

paracrine way. We came to this conclusion because we did not detect synaptic contacts between ITP-immunoreactive processes and cells in the lamina. This peptide probably diffuses in the distal lamina and may facilitate chloride and/or other ion-dependent swelling and shrinking of the L1 and L2 axons. At least two ion pumps; the V-ATPase and Na<sup>+</sup>/K<sup>+</sup>-ATPase, show robust cyclical activity in the epithelial glial cells [55,56]. The epithelial glial cells swell and shrink in anti-phase to the L1 and L2 interneurons [9]. Our preliminary results showed, that in a transgenic line carrying RNAi to block ITP expression, the pattern of rhythmic changes in the level of the  $\alpha$ -subunit of the Na<sup>+</sup>/K<sup>+</sup>-ATPase in the lamina glial cells of *D. melanogaster* is different than the pattern in wild-type flies (Damulewicz M. and Pyza E., unpublished results). Thus, not only CRY but also ITP is important for maintaining rhythmic activity changes of the Na<sup>+</sup>/K<sup>+</sup>-ATPase.

The function of ITP in the nervous system is unknown. In the lamina ITP may play a similar regulatory role as in hindgut of insects, transporting ions and fluids across cell membranes [65,66].

Since the L1 and L2 monopolar cells swell in the morning and in the evening, ITP released from the 5<sup>th</sup> s-LN<sub>v</sub> may drive the evening peak of this rhythm. This is thought to be so, because the 5<sup>th</sup> s-LN<sub>v</sub> and LN<sub>d</sub> are regarded as the lateral neurons' evening oscillator. In turn, PDF may drive the morning peak because PDF is thought to control the morning peak of locomotor activity, in a LD 12:12 regime [20,21]. However, PDF's role in promoting locomotor activity in the evening has also been shown [67]. The role of ITP as a neurotransmitter of circadian information to the lamina and as a possible regulator of rhythmic swelling and shrinking of the L1 and L2 monopolar cells, requires more experimentation and will be the subject of the next study.

## Materials and Methods

### Animals

For the experiments, we used *D. melanogaster* Canton-S wild-type and transgenic lines: *cry*-GAL4 and UAS-S65T-GFP. To characterize cells with *cry*-active promoter, we used *cry-gal4(39)* [68,48] (kindly donated by Dr. François Rouyer) expressing the yeast transcription factor gene *gal4*, under the control of the *cry* promoter crossed to the *UAS-S65T-gfp* line. In this line, the expression of GFP in cytoplasm is under the control of the UAS sequence. Virgin females of the *cry-gal4* strain were crossed to *UAS-S65T-gfp* males. In the first generation, progeny cells with the active *cry* promoter were labeled with GFP. Canton-S flies were used as the control. Flies were reared on a standard medium (cornmeal, agar, honey, yeast) in 25±1°C, in a LD 12:12 light regime (12 h of light and 12 h of darkness). Males and females

which were five days old were used for the experiments. Each experiment was repeated at least three times and the results were examined in 30 individuals at each time point.

### Immunohistochemistry

Flies were decapitated four times, to look for possible structural changes during the day of LD 12:12 at: ZT1, ZT4, ZT13 and ZT16 (ZT0 – the beginning of the day, ZT12 – the beginning of the night). The flies were fixed in 4% paraformaldehyde in phosphate buffer saline (PBS; pH 7.4) for 4 h. Next, they were cryoprotected by incubating in 12.5% sucrose for 10 min and in 25% sucrose at 4°C overnight. Heads were embedded in Tissue Tek, frozen in liquid nitrogen, and cryostat 20 µm sections were cut. Alternatively, heads were fixed for 4 h, washed in PBS, and cut with vibratome on 100 µm sections. The sections were washed in PBS for 30 min. and 5 times in phosphate buffer (PB) with an addition of 0.2% TritonX100 (PBT). After that, sections were incubated in 5% normal goat serum (NGS) with an addition of 0.5% Bovine Serum Albumin (BSA) for 30 min first at room temperature, and then incubating the brain tissues with primary antibodies for 24 h (Table 1). Afterwards, sections were washed 6 times in PBT/BSA, and blocked in 5% NGS for 45 min. After that, secondary antibodies were applied overnight in 4°C (Table 2). Finally, sections were washed twice in BSA, 6 times in PBT, and twice in PBS. Then, cryosections or vibratome sections were mounted in Vectashield medium (Vector) and examined with a Zeiss Meta 510 Laser Scanning Microscope. Confocal images of 100 µm vibratome or 20 µm frozen sections were captured at 0.47 µm and 1 µm intervals, respectively, and viewed as Z-stacks. To measure differences at four ZTs in the fluorescence intensity of GFP in CRY-positive cells, we used the same parameters for brightness, contrast and other image settings. The fluorescence intensity of GFP in selected cells was measured using the already described methods [55]. For a particular cell, the mean level of fluorescence intensity was converted to the Mean Gray Value of that cell and quantified using ImageJ v. 1.4 software (NIH, Bethesda).

### Acknowledgments

We would like to thank Dr. Neil Audsley, Dr. Bernhard T. Hovemann, Dr. Jan A. Veenstra and Dr. François Rouyer for providing the antibodies and *Drosophila* strains.

### Author Contributions

Conceived and designed the experiments: EP. Performed the experiments: MD. Analyzed the data: MD EP. Wrote the paper: EP. Obtained the antibodies and *Drosophila* transgenic lines: EP.

## References

1. Siwicki KK, Eastman C, Petersen G, Rosbash M, et al. (1988) Antibodies to the *period* gene product of *Drosophila* reveal diverse tissue distribution and rhythmic changes in the visual system. *Neuron* 1: 141–150.
2. Zerr DM, Hall JC, Rosbash M, Siwicki KK (1990) Circadian fluctuation of *period* protein immunoreactivity in the CNS and the visual system of *Drosophila*. *J Neurosci* 10: 2749–2762.
3. Stanewsky R, Frisch B, Brandes C, Hamblen-Coyle MJ, Rosbash, et al. (1997) Temporal and spatial expression patterns of transgenes containing increasing amounts of the *Drosophila* clock gene *period* and a lacZ reporter: mapping elements of the PER protein involved in circadian cycling. *J Neurosci* 17: 676–696.
4. Pyza E, Meinertzhagen IA (1997) Circadian rhythms in screening pigment and invaginating organelles in photoreceptor terminals of the housefly's first optic neuropil. *J Neurobiol* 32: 517–529.
5. Pyza E, Meinertzhagen IA (1993) Daily and circadian rhythms of synaptic frequency in the first visual neuropile of the housefly's (*Musca domestica* L.) optic lobe. *Proc Biol Sci* 254: 97–105.
6. Pyza E, Meinertzhagen IA (1995) Monopolar cell axons in the first optic neuropil of the housefly, *Musca domestica* L., undergo daily fluctuations in diameter that have a circadian basis. *J Neurosci* 15: 407–418.
7. Pyza E, Meinertzhagen IA (1999) Daily rhythmic changes of cell size and shape in the first optic neuropil in *Drosophila melanogaster*. *J Neurobiol* 40: 77–88.
8. Weber P, Kula-Eversole E, Pyza E (2009) Circadian control of dendrite morphology in the visual system of *Drosophila melanogaster*. *PLoS One* 4: e2490.
9. Pyza E, Górska-Andrzejak J (2004) Involvement of glial cells in rhythmic size changes in neurons of the housefly's visual system. *J Neurobiol* 59: 205–215.
10. Pyza E, Cymborowski B (2001) Circadian rhythms in behaviour and in the visual system of the blow fly, *Calliphora vicina*. *J Insect Physiol* 47: 897–904.
11. Górska-Andrzejak J, Keller A, Raabe T, Kilianek L, Pyza E (2005) Structural daily rhythms in GFP-labeled neurons in the visual system of *Drosophila melanogaster*. *Photochem Photobiol Sci* 4: 721–726.
12. Pyza E, Meinertzhagen IA (1998) Neurotransmitters alter the numbers of synapses and organelles in photoreceptor terminals in the lamina of the housefly, *Musca domestica*. *J Comp Physiol A* 183: 719–727.
13. Kula E, Pyza E (2007) Effects of locomotor stimulation and protein synthesis inhibition on circadian rhythms in size changes of L1 and L2 interneurons in the fly's visual system. *Dev Neurobiol* 67: 1433–1442.
14. Pyza E (2001) Cellular circadian rhythms in the fly's visual system. In: Denlinger DL, Giebultowicz JM, Saunders DS, eds. *Insect Timing: Circadian Rhythmicity to Seasonality*. Amsterdam: Elsevier. pp 55–68.
15. Pyza E (2002) Dynamic structural changes of synaptic contacts in the visual system of insects. *Microsc Res Tech* 58: 335–344.
16. Balyas M, Pyza E (2001) Localization of the clock controlling circadian rhythms in the first neuropile of the optic lobe in the housefly. *J Exp Biol* 204: 3303–3310.
17. Pyza E, Siuta T, Tanimura T (2003) Development of PDF-immunoreactive cells, possible clock neurons, in the housefly *Musca domestica*. *Microsc Res Tech* 62: 103–113.
18. Shafer OT, Helfrich-Förster C, Renn SC, Taghert PH (2006) Reevaluation of *Drosophila melanogaster*'s neuronal circadian pacemakers reveal new neuronal classes. *J Comp Neurol* 498: 180–193.
19. Helfrich-Förster C, Shafer OT, Wülbeck C, Grieshaber E, Rieger D, et al. (2007) Development and morphology of the clock-gene-expressing lateral neurons of *Drosophila melanogaster*. *J Comp Neurol* 500: 47–70.
20. Grima B, Chélot E, Xia R, Rouyer F (2004) Morning and evening peaks of activity rely on different clock neurons of the *Drosophila* brain. *Nature* 431: 869–873.
21. Stoleru D, Peng Y, Agosto J, Rosbash M (2004) Coupled oscillators control morning and evening locomotor behaviour of *Drosophila*. *Nature* 431: 862–868.
22. Rieger D, Shafer OT, Tomioka K, Helfrich-Förster C (2006) Functional analysis of circadian pacemaker neurons in *Drosophila melanogaster*. *J Neurosci* 26: 2531–2543.
23. Zhang Y, Liu Y, Bilodeau-Wentworth D, Hardin PE, Emery P (2010) Light and temperature control the contribution of specific DN1 neurons to *Drosophila* circadian behavior. *Curr Biol* 20: 600–605.
24. Fujii S, Amrein H (2010) Ventral lateral and DN1 clock neurons mediate distinct properties of male sex drive rhythm in *Drosophila*. *Proc Natl Acad Sci USA* 107: 10590–10595.
25. Yoshii T, Heshiki Y, Ibuki-Ishibashi T, Matsumoto A, Tanimura T, et al. (2005) Temperature cycles drive *Drosophila* circadian oscillation in constant light that otherwise induces behavioural arrhythmicity. *Eur J Neurosci* 22: 1176–1184.
26. Miyasako Y, Umezaki Y, Tomioka K (2007) Separate sets of cerebral clock neurons are responsible for light and temperature entrainment of *Drosophila* circadian locomotor rhythms. *J Biol Rhythms* 22: 115–126.
27. Helfrich-Förster C (1995) The *period* clock gene is expressed in central nervous system neurons which also produce a neuropeptide that reveals the projections of circadian pacemaker cells within the brain of *Drosophila melanogaster*. *Proc Natl Acad Sci USA* 92: 612–616.
28. Renn SC, Park JH, Rosbash M, Hall JC, Taghert PH (1999) A pdf neuropeptide gene mutation and ablation of PDF neurons each cause severe abnormalities of behavioral circadian rhythms in *Drosophila*. *Cell* 99: 791–802.
29. Peng Y, Stoleru D, Levine JD, Hall JC, Rosbash M (2003) *Drosophila* free-running rhythms require intercellular communication. *PLoS Biol* 1: E13.
30. Lin Y, Stormo GD, Taghert PH (2004) The neuropeptide pigment-dispersing factor coordinates pacemaker interactions in the *Drosophila* circadian system. *J Neurosci* 24: 7951–7957.
31. Park JH, Helfrich-Förster C, Lee G, Liu L, Rosbash M, et al. (2000) Differential regulation of circadian pacemaker output by separate clock genes in *Drosophila*. *Proc Natl Acad Sci USA* 97: 3608–3613.
32. Park D, Veenstra JA, Park JH, Taghert PH (2008) Mapping peptidergic cells in *Drosophila*: where DIMM fits in. *PLoS One* 3: e1896.
33. Helfrich-Förster C (2009) Does the morning and evening oscillator model fit better for flies or mice? *J Biol Rhythms* 24: 259–270.
34. Im SH, Taghert PH (2010) PDF receptor expression reveals direct interaction between circadian oscillators in *Drosophila*. *J Comp Neurol* 518: 1925–1945.
35. Pyza E, Meinertzhagen IA (1996) Neurotransmitters regulate rhythmic size changes amongst cells in the fly's optic lobe. *J Comp Physiol A* 178: 33–45.
36. Myers EM, Yu J, Sehgal A (2003) Circadian control of eclosion: interaction between a central and peripheral clock in *Drosophila melanogaster*. *Curr Biol* 13: 526–533.
37. Johard H, Yoishii T, Dirksen H, Cusumano P, Rouyer F, et al. (2009) Peptidergic clock neurons in *Drosophila*: Ion Transport Peptide and Short Neuropeptide F in subsets of dorsal and ventral lateral neurons. *J Comp Neurol* 516: 59–73.
38. Emery P, So WV, Kaneko M, Hall JC, Rosbash M (1998) CRY, a *Drosophila* clock and light-regulated cryptochrome, is a major contributor to circadian rhythm resetting and photosensitivity. *Cell* 95: 669–679.
39. Ceriani MF, Darlington TK, Staknis D, Más P, Petri AA, et al. (1999) Light-dependent sequestration of TIMELESS by CRYPTOCHROME. *Science* 285: 553–556.
40. Naidoo N, Song W, Hunter-Ensor M, Sehgal A (1999) A role for the proteasome in the light response of the timeless clock protein. *Science* 285: 1737–1741.
41. Lee C, Parikh V, Tsukaichi T, Bac K, Edery I (1996) Resetting the *Drosophila* clock by photic regulation of PER and a PER-TIM complex. *Science* 271: 1740–1744.
42. Krishnan B, Levine JD, Lynch MK, Dowse HB, Funes P, et al. (2001) A new role for cryptochrome in a *Drosophila* circadian oscillator. *Nature* 411: 313–317.
43. Ivanchenko M, Stanewsky R, Giebultowicz JM (2001) Circadian photoreception in *Drosophila*: functions of cryptochrome in peripheral and central clocks. *J Biol Rhythms* 16: 205–215.
44. Collins B, Mazzoni EO, Stanewsky R, Blau J (2006) *Drosophila* CRYPTOCHROME is a circadian transcriptional repressor. *Curr Biol* 16: 441–449.
45. Yoshii T, Todo T, Wülbeck C, Stanewsky R, Helfrich-Förster C (2008) Cryptochrome is present in the compound eyes and a subset of *Drosophila*'s clock neurons. *J Comp Neurol* 508: 952–966.
46. Romero-Calderón R, Uhlenbrock G, Borycz J, Simon AF, Grygoruk A, et al. (2008) A glial variant of a vesicular monoamine transporter is required to store histamine in the *Drosophila* visual system. *PLoS Genet* 4: e1000245.
47. Emery P, Stanewsky R, Helfrich-Förster C, Emery-Le M, Hall JC, et al. (2000) *Drosophila* CRY is a deep brain circadian photoreceptor. *Neuron* 26: 493–504.
48. Zhao J, Kilman VL, Keegan KP, Peng Y, Emery P, et al. (2003) *Drosophila* clock can generate ectopic circadian clocks. *Cell* 113: 755–766.
49. Klarsfeld A, Malpel S, Michard-Vanhée C, Picot M, Chélot E, et al. (2004) Novel features of cryptochrome-mediated photoreception in the brain circadian clock of *Drosophila*. *J Neurosci* 24: 1468–1477.
50. Benito J, Houl JH, Roman GW, Hardin PE (2008) The blue-light photoreceptor CRYPTOCHROME is expressed in a subset of circadian oscillator neurons in the *Drosophila* CNS. *J Biol Rhythms* 23: 296–307.
51. Zheng H, Ng F, Liu Y, Hardin PE (2008) Spatial and temporal regulation of *cry* in *Drosophila*. *J Biol Rhythms* 23: 283–295.
52. Suh J, Jackson FR (2007) *Drosophila* Ebony activity is required in glia for the circadian regulation of locomotor activity. *Neuron* 55: 435–447.
53. Xiong WC, Okano H, Patel NH, Blendy JA, Montell C (1994) Repo encodes a glial-specific homeo domain protein required in the *Drosophila* nervous system. *Genes Dev* 8: 981–994.
54. Awasaki T, Lai SL, Ito K, Lee T (2008) Organization and postembryonic development of glial cells in the adult central brain of *Drosophila*. *J Neurosci* 28: 13742–13753.
55. Górska-Andrzejak J, Salvaterra PM, Meinertzhagen IA, Krzeptowski W, Görlich, et al. (2009) Cyclical expression of Na<sup>+</sup>/K<sup>+</sup>-ATPase in the visual system of *Drosophila melanogaster*. *J Insect Physiol* 55: 459–468.
56. Pyza E, Borycz J, Giebultowicz JM, Meinertzhagen IA (2004) Involvement of V-ATPase in the regulation of cell size in the fly's visual system. *J Insect Physiol* 50: 985–994.
57. Pyza E, Meinertzhagen IA (1999) The role of clock genes and glial cells in expressing circadian rhythms in the fly's lamina. *Cold Spring Harbor Neurobiology of Drosophila*. pp 145.
58. Helfrich-Förster C (1998) Robust circadian rhythmicity of *Drosophila melanogaster* requires the presence of lateral neurons: a brain-behavioral study of disconnected mutants. *J Comp Physiol A* 182: 435–453.
59. Sheeba V, Fogle KJ, Kaneko M, Rashid S, Chou YT, et al. (2008) Large ventral lateral neurons modulate arousal and sleep in *Drosophila*. *Curr Biol* 18: 1537–1545.

60. Shang Y, Griffith LC, Rosbash M (2008) Light-arousal and circadian photoreception circuits intersect at the large PDF cells of the *Drosophila* brain. *Proc Natl Acad Sci USA* 105: 19587–19594.
61. Myers EM, Yu J, Sehgal A (2003) Circadian control of eclosion: interaction between a central and peripheral clock in *Drosophila melanogaster*. *Curr Biol* 13: 526–533.
62. Pyza E, Meinertzhagen IA (1997) Neurites of *period*-expressing PDH cells in the fly's optic lobe exhibit circadian oscillations in morphology. *Eur J Neurosci* 9: 1784–1788.
63. Miskiewicz K, Schürmann FW, Pyza E (2008) Circadian release of pigment-dispersing factor in the visual system of the housefly, *Musca domestica*. *J Comp Neurol* 509: 422–435.
64. Miskiewicz K, Pyza E, Schürmann FW (2004) Ultrastructural characteristics of circadian pacemaker neurons, immunoreactive to an antibody against a pigment-dispersing hormone in the fly's brain. *Neurosci Lett* 363: 73–77.
65. Audsley N, McIntosh C, Philips JE (1992) Isolation of a neuropeptide from locust corpus cardiacum which influences ileal transport. *J Exp Biol* 173: 261–274.
66. Phillips JE, Wiens C, Audsley N, Jeffs L, Bilgen T, et al. (1996) Nature and control of chloride transport in insect absorptive epithelia. *J Exp Zool* 275: 292–299.
67. Cusumano P, Klarsfeld A, Chélot E, Picot M, Richier B, et al. (2009) PDF-modulated visual inputs and cryptochrome define diurnal behavior in *Drosophila*. *Nature Neurosci* 12: 1427–1433.
68. Pyza E (2010) Circadian rhythms in the fly's visual system. In: Dartt DA, ed. *Encyclopedia of the eye*. Oxford: Academic Press. Vol 1. pp 302–311.
